# Supplementary material
Source: PubMed Central journal article supplement (PMC5896009)
Supplement: NIHMS954143-supplement-Supplemental.pdf [file NIHMS954143-supplement-Supplemental.pdf]

## 6.0 Supplemental Tables and Figures

**Table S1.** LAMP and qPCR primers used for experiments in this study. Degenerate bases are underlined.

| Primer                        | Start Position | Sequence 5' - 3'                                     |
|-------------------------------|----------------|------------------------------------------------------|
| 16S rRNA gene                 |                |                                                      |
| targeting <i>Dehalobacter</i> |                |                                                      |
| F3                            | 182            | GAGAAGAAAGCTGGCCTCTG                                 |
| B3                            | 394            | GGCCTTCTTCATACACGCG                                  |
| FIP                           | 258-206        | GATCGTCGCCTTGGTAGGCC-TGCTAGCGCTTAGGGATGG             |
| BIP                           | 302-363        | GGCCACACTGGGACTGAGACA-TCAGACTTTCGTCCATTGCG           |
| LF                            | 228            | CCAACTAGCTAATCAGACGCG                                |
| LB                            | 342            | AGGCAGCAGTGGGGAATCTTC                                |
| <i>rdhA</i> gene              |                |                                                      |
| F3                            | 1171           | TTCGGTCCGAGAM <u>W</u> TCGC                          |
| B3                            | 1340           | TCCG <u>M</u> TACCTCAM <u>M</u> ATCCT                |
| FIP                           | 1234-1192      | ACTCGCGTACCCCGAATTTTT <u>Y</u> T-GCCAAAGTCTACACCGACC |
| BIP                           | 1258-1321      | TGCCGCCTGTGCAAAAAATGTG-CTGGCTGCAGAACCTTAGG           |
| LF                            | 1211           | TGTCCGGAGCAAGTTCCA                                   |
| LB                            | 1295           | CCCAGGCCATCTCCCA <u>Y</u> GA                         |
| MIAC luc gene F3              |                |                                                      |
|                               | 1098           | AGGACTCTGGTACAAAATCG                                 |
| B3                            | 1302           | ACGTGAATTGCTCAACAGTA                                 |
| FIP                           | 1166-1120      | ACGGATTACCAGGGATTTTCAGTC-TTCATTA AAAACCGGGAGGT       |
| BIP                           | 1235-1283      | TGCACGTTCAAAAATTTTTTGCAAC-GAACATTTTCGCAGCCTAC        |
| LF                            | 1139           | ACACGTTTCGTCACATCTCATCT                              |
| LB                            | 1259           | CCCTTTTTGGAAACAAACACTACG                             |
| qPCR <i>rdhA</i>              |                |                                                      |
| Forward                       |                | GCAGGAAGATTCTAAAACCTTG                               |
| Reverse                       |                | CACCGAGGTACTGGAAATGA                                 |
| qPCR luc                      |                |                                                      |
| Forward                       |                | TACAACACCCCAACATCTTCGA                               |
| Reverse                       |                | GGAAGTTCACCGGCGTCAT                                  |

**Table S2.** Testing selected LAMP assay specificity with gDNA from *Dehalobacter* and non-targeted organisms. Percent similarity is based on 16S rRNA gene of organisms or close relative if the 16S rRNA gene was not available in public databases.

| 16S rRNA gene classification                    | % Similarity to <i>Dehalobacter</i> | Organism                                                        | <i>rdhA</i> gene | 16S rRNA gene |
|-------------------------------------------------|-------------------------------------|-----------------------------------------------------------------|------------------|---------------|
| d: Bacteria, c: Clostridia, f: Peptococcaceae 1 | -                                   | <i>Dehalobacter</i> spp. (in CB&I TCA-20 <sup>TM</sup> culture) | +                | +             |
| d: Bacteria, c: Clostridia, f: Peptococcaceae 1 | 93.2%                               | <i>Syntrophobotulus glycolicus</i> (DSM 8271)                   | -                | +             |
| d: Bacteria, c: Deltaproteobacteria             | 79.3%                               | <i>Desulfacinum infernum</i> (DSM 9756)                         | -                | -             |
| d: Bacteria, c: Deltaproteobacteria             | 79.7%                               | <i>Desulfobacterium autotrophicum</i> (DSM 3382)                | -                | -             |
| d: Bacteria, c: Deltaproteobacteria             | 82.8%                               | <i>Desulfomicrobium baculatum</i> (DSM 4028)                    | -                | -             |
| d: Bacteria, c: Deltaproteobacteria             | 85.1%                               | <i>Desulfonauticus submarinus</i> (DSM 15269)                   | -                | -             |
| d: Bacteria, c: Deltaproteobacteria             | 82.2%                               | <i>Syntrophobacter wolinii</i> (DSM 2805)                       | -                | -             |
| d: Bacteria, c: Thermodesulfobacteria           | 79.6%                               | <i>Thermodesulfobacterium commune</i> (DSM 2178)                | -                | -             |
| d: Bacteria, c: Deltaproteobacteria             | 82.1%                               | <i>Thermodesulforhabdus norvegica</i> (DSM 9990)                | -                | -             |
| d: Bacteria, c: Nitrospira                      | 77.8%                               | <i>Thermodesulfovibrio yellowstonii</i> (DSM 11347)             | -                | -             |
| d: Archaea                                      | 64.0%                               | <i>Methanococcus</i> sp. (DSM 8766)                             | -                | -             |
| d: Archaea                                      | 63.2%                               | <i>Methanosarcina</i> sp. (DSM 4659)                            | -                | -             |

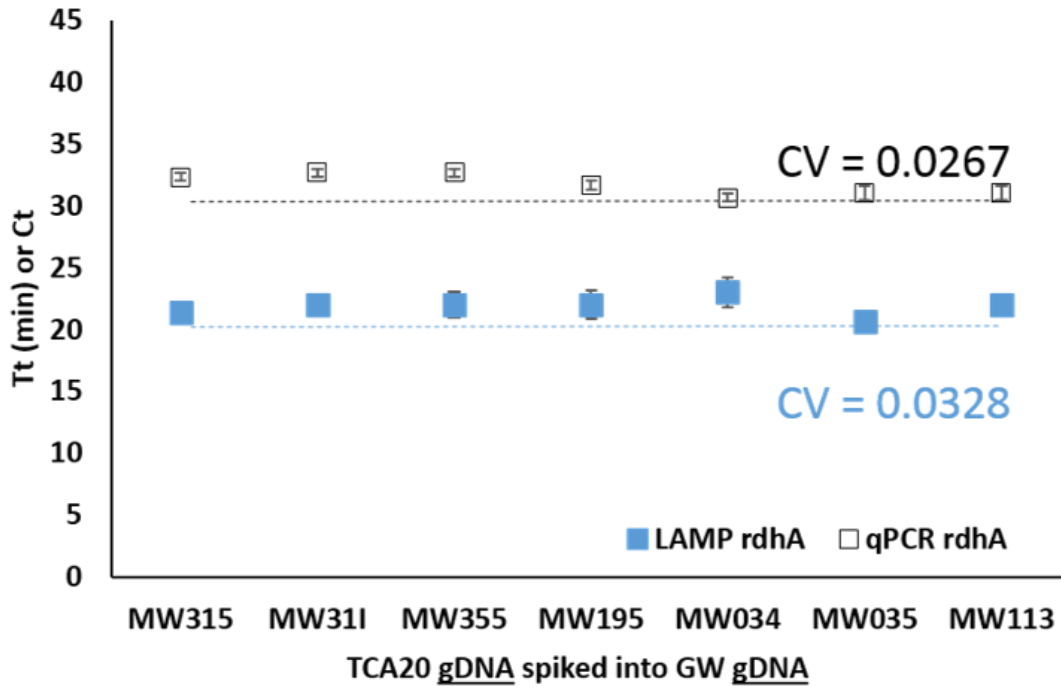

**Fig S1.**  $C_t$  and  $T_t$  measured by spiking 5 ng of DNA extracted from TCA-20 into DNA extracted from the groundwater samples. CV indicates the coefficient of variation. Error bars represent standard error of three technical replicates. In some cases error bars are smaller than symbols.

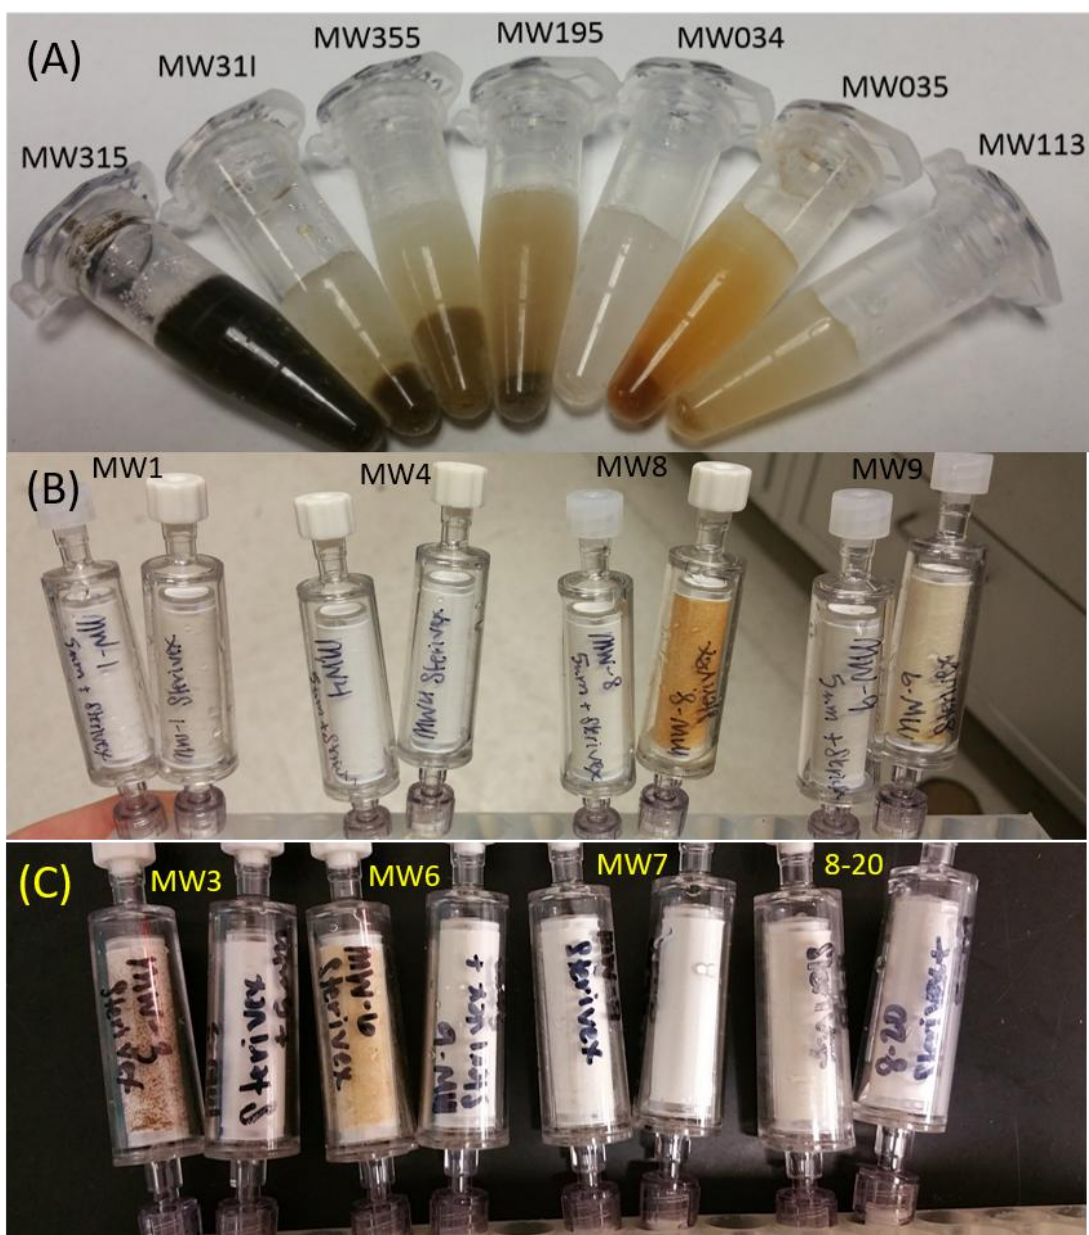

**Fig S2.** Picture of concentrated groundwater samples collected from remediation sites A) elution collected after concentration with Sterivex filters, B-C) Sterivex filters after passing 200 mL of eight groundwater samples with and without a 5 micron filter to remove suspended solids. In (B) Sterivex filters used after 5 micron filtration are on the left of each pair, in (C) Sterivex filters used after 5 micron filters are on the right side of each pair.
